# Supplementary material
Source: PubMed Central journal article supplement (PMC2932884)
Supplement: NIHMS223362-supplement-5.pdf [file NIHMS223362-supplement-5.pdf]

Type of file: figure

Label: 7

Filename: figure\_7.tif

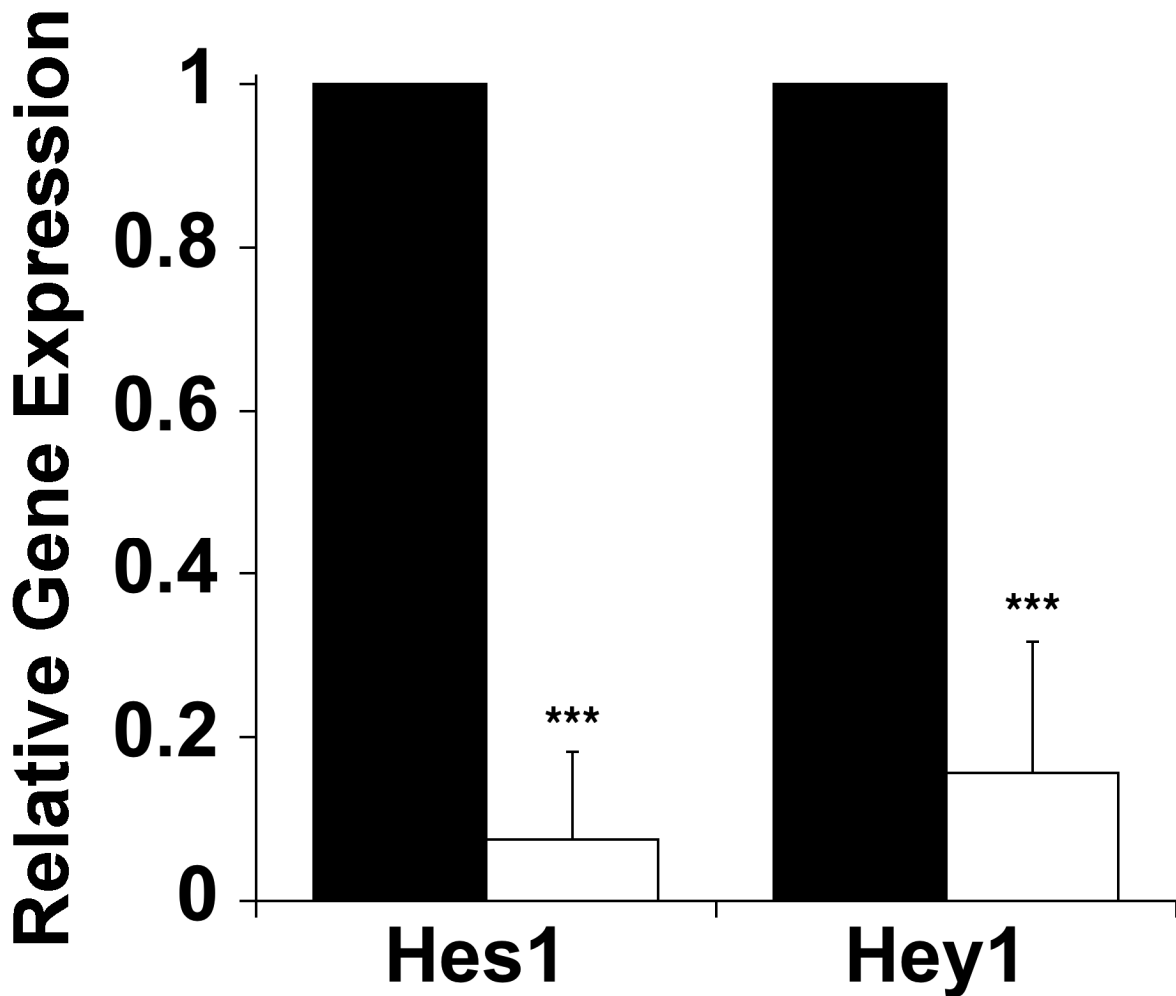

Supplementary Fig. S4. Gilbert et al.

Type of file: figure

Label: 8

Filename: figure\_8.tif

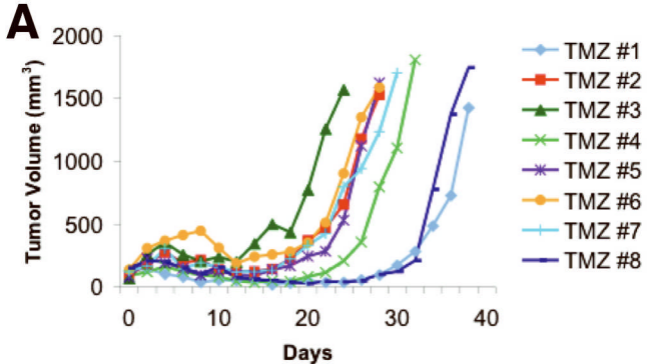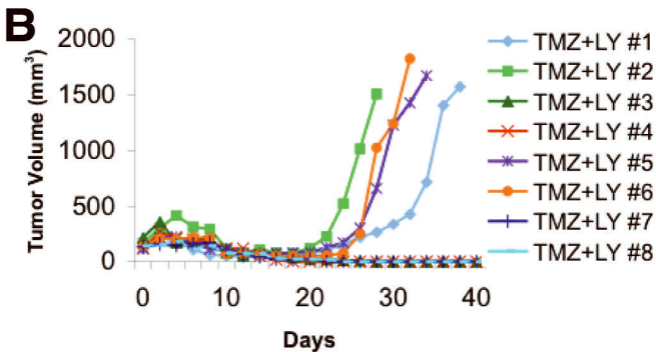

**Supplementary Fig. S5. Gilbert et al.**

Type of file: figure

Label: 9

Filename: figure\_9.tif

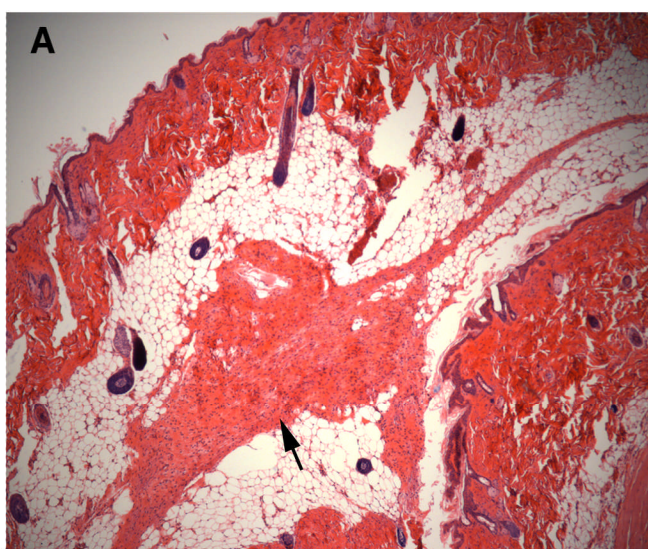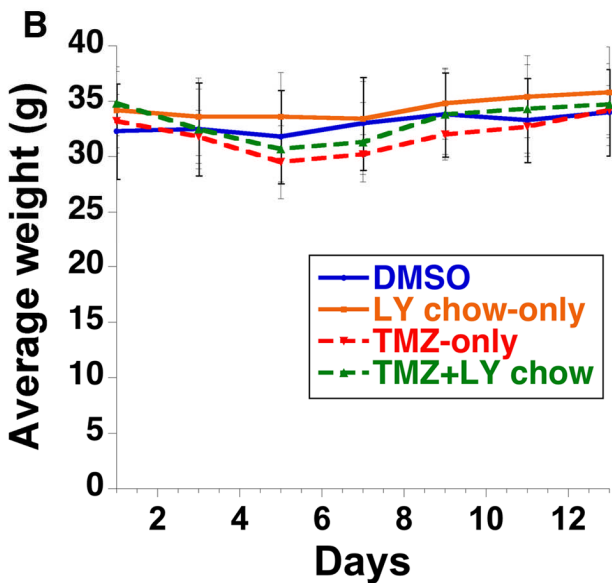

Supplementary Fig. S6. Gilbert et al
